# Supplementary material
Source: PubMed Central journal article supplement (PMC1955715)
Supplement: plntcell_tpc.107.052522_2.pdf [file plntcell_tpc.107.052522_2.pdf]

**Supplemental Table 1. Oligonucleotide Primers Used for PCR**

| Primer name          | Sequence                                                             |
|----------------------|----------------------------------------------------------------------|
| 35S-D1               | 5'-CGCAAGACCCTTCTCTATATAAGG-3'                                       |
| EGFP-rXba-S          | 5'-CTCTAGAGAGTCCGGACTTGTACAGCTCGTCC-3'                               |
| Strep-U              | 5'-CTAGATGGAGCCACCCGCAGTTCGAAAACTCCACCACCATCA<br>CCATCACCATCACTAA-3' |
| Strep-L              | 5'-CTAGTTAGTGATGGTGATGGTGATGGTGAGTTTTTCGAAC<br>TGCGGTGGCTCCAT-3'     |
| Cm16-1-FE            | 5'-GGAATTCAAAATGGGGATGGGAATGATGGAGGTCC-3'                            |
| Cm16-1-RSSal         | 5'-GGTCGACCCGTTTTCCCATGGGTAACATCCTCCA-3'                             |
| Cm16-1-RSal          | 5'-GGTCGACTTAGTTTTCCCATGGGTAACATCCTCCA-3'                            |
| NCAPP1 $\Delta$ N-FE | 5'-GGAATTCAAAATGAGAGGGCGCAAGATAGGGATATATG-3'                         |
| NCAPP1-RSSal         | 5'-GGTCGACCCGTTTTCTTGATGGAGAATGTG-3'                                 |
| NCAPP1-RSal          | 5'-GGTCGACCTAGTATTTCTTGATGGAGAATGTG-3'                               |
| CmPP16-S12A-U        | 5'-TGATGGAGGTCCATTTGATTGCTGGTAAAGGAC-3'                              |
| CmPP16-S12A-L        | 5'-AATCAAATGGACCTCCATCATTCCCATCCC-3'                                 |
| CmPP16-S41A-U        | 5'-TCAAGGGCCAAGAACGCATGGCTAAAGTTGCTA-3'                              |
| CmPP16-S41A-L        | 5'-CATGCGTTCTTGGCCCTTGAAGTTGATCTC-3'                                 |
| CmPP16-Y63A-U        | 5'-GAAATTTAAATTCCTAGCCGAGGCTCCTGGGAGCGG-3'                           |
| CmPP16-Y63A-L        | 5'-CTCGGCTAGGAATTTAAATTTCTCATCCCA-3'                                 |
| CmPP16-S66A-U        | 5'-TCCTAGCCGAGTACCCTGGGGCTGGTGGTGACT-3'                              |
| CmPP16-S66A-L        | 5'-CCCAGGGTACTCGGCTAGGAATTTAAATTTTC-3'                               |
| CmPP16-S66D-U        | 5'-TCCTAGCCGAGTACCCTGGGGATGGTGGTGACT-3'                              |
| CmPP16-S108A-U       | 5'-AAGGAGTTAGAAAAGGAAAGGCTGAGATGCCGC-3'                              |
| CmPP16-S108A-L       | 5'-CTTTCCTTTTCTAACTCCTTCCGCTAATAA-3'                                 |
| CmPP16-S133A-U       | 5'-GAGAAATTGAAGTTGGAGTAGCTTCAAGCTGC-3'                               |
| CmPP16-S133A-L       | 5'-TACTCCAATTCAATTTCTCCCTTGAAGTG-3'                                  |
| CmPP16-P25-F         | 5'-GGAATTCAAAATGGGACCAATGACCCTTATGCTGAGATC-3'                        |
| CmPP16-G48-F         | 5'-GGAATTCAAAATGGGAGGACCAAATCCATTATGGGATGAG-3'                       |
| CmPP16-G83-R         | 5'-GGTCGACTTAATCTATAGCGTCATGGTCCATGAC-3'                             |
| CmPP16-K105-R        | 5'-GGTCGACTTATTTTCTAACTCCTTCCGCTAATAA-3'                             |
